# Supplementary material
Source: PubMed Central journal article supplement (PMC3911025)
Supplement: AEM.03001-13_zam999105000so1.pdf [file AEM.03001-13_zam999105000so1.pdf]

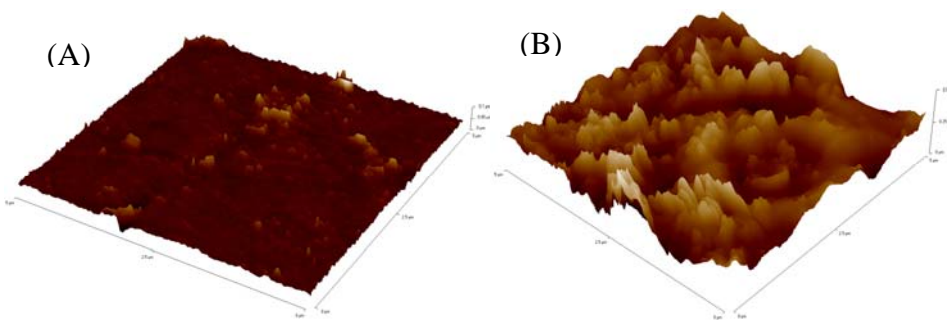

Figure S1. Example topography images of the original plastic surface (A) and the coated surface (B) based on AFM characterization.

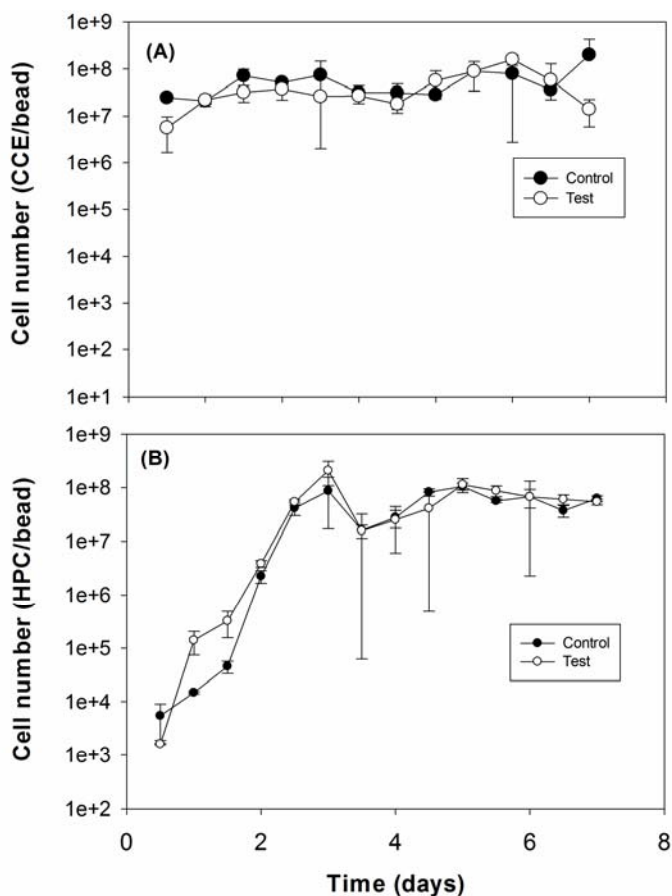

Figure S2. Biofilm biomass as indicated by the qPCR quantified calibrator cell equivalence (CCE/bead) (A) and heterotrophic plate count (HPC/bead) (B) during the third independent reactor startup.
